1 Metagenomic 16S rRNA gene sequencing  
2 survey of *Borrelia* species in Irish samples  
3 of *Ixodes ricinus* ticks  
4  
5

6 **John S Lambert<sup>1,2\*</sup>, Michael John Cook<sup>3</sup>, John Eoin Healy<sup>4</sup>, Ross Murtagh<sup>1</sup>, Gordana**  
7 **Avramovic<sup>1,2</sup>, Sin Hang Lee<sup>5</sup>**

8  
9 <sup>1</sup> University College Dublin, Dublin, Ireland

10 <sup>2</sup> Mater Misericordiae University Hospital, Dublin, Ireland

11 <sup>3</sup> Independent Researcher, Highcliffe, Dorset, UK

12 <sup>4</sup> University College Cork, Cork, Ireland

13 <sup>5</sup> Milford Molecular Diagnostics, Connecticut, USA

14  
15 \* Corresponding Author

16 Email: [jlambert@mater.ie](mailto:jlambert@mater.ie)  
17  
18  
19  
20  
21  
22  
23  
24  
25  
26  
27

## 28 Abstract

29 Lyme borreliosis is a systemic infection caused by tick-borne pathogenic borreliae of the  
30 *Borrelia burgdorferi* sensu lato complex or of the more heterogeneous relapsing fever borrelia  
31 group. Clinical distinction of the infections due to different borrelia species is difficult. Accurate  
32 knowledge of the prevalence and the species of borreliae in the infected ticks in the endemic  
33 areas is valuable for formulating appropriate guidelines for proper management of this infectious  
34 disease. The purpose of this research was to design a readily implementable protocol to detect  
35 the divergent species of borreliae known to exist in Europe, using Irish samples of *Ixodes ricinus*  
36 ticks as the subject for study. Questing *I. ricinus* nymph samples were taken at six localities  
37 within Ireland. The crude DNA of each dried tick was extracted by hot NH<sub>4</sub>OH and used to  
38 initiate a same-nested PCR with a pair of borrelial genus-specific primers to amplify a highly  
39 conserved 357/358 bp segment of the 16S rRNA gene for detection and as the template for  
40 Sanger sequencing. To distinguish *B. garinii* from *B. burgdorferi* and to discriminate the various  
41 strains of *B. garinii*, a second 282 bp segment of the 16S rRNA gene was amplified for Sanger  
42 sequencing. A signature segment of the DNA sequence excised from the computer-generated  
43 electropherogram was submitted to the GenBank for BLAST alignment analysis. A 100% ID  
44 match with the unique reference sequence in the GenBank was required for the molecular  
45 diagnosis of the borrelial species or strain. We found the overall rate of borrelial infection in the  
46 Irish tick population to be 5%, with a range from 2% to 12% depending on the locations of tick  
47 collection. At least 3 species, namely *B. garinii*, *B. valaisiana* and *B. miyamotoi*, are infecting the  
48 ticks collected in Ireland. The isolates of *B. garinii* were confirmed to be strain BgVir, strain  
49 Bernie or strain T25. Since antigens for diagnostic serology tests may be species- or even strain-  
50 specific, expanded surveillance of the species and strains of the borreliae among human-biting  
51 ticks in Ireland is needed to ensure that the antigens used for the serology tests do contain the  
52 epitopes matching the antibodies elicited by the borrelial species and strains in the ticks  
53 cohabitating in the same environment.

## 54 Introduction

55 Lyme borreliosis (or Lyme and related borreliosis) can be caused by many members of the  
56 *Borrelia burgdorferi* sensu lato (B.b.s.l) complex [1] and the more heterogeneous group of  
57 relapsing fever borreliae [2] which are transmitted to humans through the bite of infected ticks of  
58 the *Ixodes* genus, including *I. ricinus*, *I. scapularis*, *I. pacificus* and *I. persulcatus*. In Europe, the  
59 pathogenic B.b.s.l. species include *Borrelia afzelii*, *B. garinii*, *B. bavariensis*, *B. spielmanii*, *B.*  
60 *valaisiana*, *B. lusitaniae* and rarely *B. burgdorferi* [1, 3-6]; the major hard tick relapsing fever  
61 borrelia is *B. miyamotoi* [7].

62 Lyme borreliosis at its early stage of infection can usually be effectively treated with timely,  
63 appropriate antibiotics to prevent deep tissue damage along with the associated clinical  
64 manifestations resulting from host immune response to various spirochetal products or  
65 components. However, if not treated early, within days to weeks, the borrelial spirochetes  
66 disseminate from the site of the tick bite to other regions of the body [8].

67 Since Lyme borreliosis only occurs in the endemic areas where the tick population is infected  
68 with pathogenic borrelial species, accurate surveys of the borrelial infections of the ticks

69 collected in the potential endemic areas can provide valuable information on the possible  
70 existence of any of these Lyme and related borrelioses, and can serve as guidelines for selection  
71 of the proper antigens for diagnostic serology tests which may be species- or even strain-specific  
72 [9-11].

73 In the past, the methods used for borrelial surveys were either designed to detect *B. burgdorferi*  
74 sensu lato [1] or to detect *B. miyamotoi* [7, 12] in ticks; the PCR primers used for these  
75 metagenomic assays were unable to amplify a conserved segment of DNA shared by all species  
76 of borreliae. Only one study used a pair of general PCR primers which can amplify a segment of  
77 16S rRNA gene of both *B. burgdorferi* sensu lato and *B. miyamotoi* for real-time PCR screening  
78 [13]. But the interprimer DNA segment of the latter real-time PCR product is only 25 bp long  
79 which is too short for automated Sanger sequencing that is required to confirm the molecular  
80 diagnosis of *B. miyamotoi* [7, 12, 13]. In addition, the dye-labeled probe 6FAM-  
81 TTCGGTACTAACTTTTAGTTAA used for the real-time PCR screening [13] may miss the  
82 species of *B. valaisiana* and *B. lusitaniae* whose corresponding complementary sequences in this  
83 segment are TTAAGTAAAGTTAGTACCGAA (Sequence ID: NR\_036807) and  
84 TTAAGTAAACAGTTAGTACCGAA (Sequence ID: AB091822), respectively, not fully matched  
85 with the sequence of the probe designed for other species of the *B. burgdorferi* sensu lato  
86 complex.

87 In the current study, we used a pair of genus-specific PCR primers to amplify a highly conserved  
88 segment with single-nucleotide polymorphisms of the borrelial 16S rRNA gene shared by all  
89 known pathogenic borrelial strains to survey the borrelial infections among the *I. ricinus* ticks  
90 collected in Ireland. Since this PCR amplicon is 357/358 bp long, the PCR products can be used  
91 as the template for direct Sanger sequencing for amplicon validation and for speciation [14]. This  
92 metagenomic 16S rRNA gene sequencing assay is most suitable for molecular diagnosis of  
93 borrelial infections in human-biting ticks and in clinical specimens in Europe because of the  
94 great diversity of causative agents in European Lyme borreliosis which needs a broad-spectrum  
95 tool to detect the target DNA from various borrelial strains and to prepare the template for  
96 Sanger sequencing to ensure diagnostic accuracy.

97 The value of routine metagenomic 16S rRNA gene sequencing is well recognized for detecting  
98 the presence of pathogenic bacteria in the environment and in clinical specimens because single  
99 nucleotide polymorphisms in the 16S rRNA gene may discriminate closely related bacterial  
100 species or indicate a mutant expressing different patterns of synthesized proteins with potential  
101 implication in antibody epitopes, virulence and drug resistance of the bacteria [15-19]. However,  
102 the usefulness of 16S rRNA gene sequencing as a tool in microbial identification is dependent  
103 upon deposition of the complete unambiguous 16S rRNA gene nucleotide sequences into a  
104 public database, such as that in the GenBank and applying the correct base labels to each  
105 sequence detected for alignment analysis [20]. Indeed, the validity of the results of studying  
106 borrelia distribution in *I. scapularis* ticks using PCR and DNA sequencing has been questioned  
107 because the DNA sequences claimed to have been detected were questionable [21]. Good-quality  
108 sequence traces in Sanger sequencing are essential for molecular diagnosis and typing of  
109 borreliae [5] in the era of precision medicine.

110 In the present study, we aimed to develop a protocol for using a single pair of genus-specific  
111 PCR primers to amplify a highly conserved segment with hypervariable regions of the borrelial  
112 16S rRNA gene for detection of all species of *Borrelia* infecting the *I. ricinus* ticks collected in  
113 Ireland and to use the positive crude nested PCR products as the templates for direct Sanger  
114 sequencing to determine the species of the borrelia detected.

115

## 116 **Materials and Methods**

117 Unfed, questing *I. ricinus* nymphs were collected by “flagging” which involves brushing the  
118 vegetation with a white towel from which the ticks can then be removed. In late May and early  
119 June 2018, samples were taken at six localities within Ireland, designed to provide a  
120 representative view of tick borrelial infection across the country. The following areas were  
121 sampled (county in parenthesis): Killarney (Kerry), Kilmacthomas (Waterford), Clifden  
122 (Galway-West), Portumna (Galway-South), Glendalough (Wicklow), and Glenveagh (Donegal)  
123 and their locations are shown on the accompanying map of Ireland (Fig 1).

### 124 **Fig 1. Sampling locations in Ireland for *Ixodes ricinus* ticks in May & June 2018.**

125 Each individual sample was made up of at least 5 sub-samples taken at different points within a  
126 locality to minimise any sampling bias. Distance between sub-sampling points was never less  
127 than 100 m.

128 The collected ticks were disinfected in 70% ethanol, air-dried on filter paper and sent to Milford  
129 Molecular Diagnostics Laboratory in Milford, Connecticut, U.S.A. to be tested. The general  
130 procedure for extraction of the crude DNA from archived ticks and for Sanger sequencing  
131 detection of the borrelial 16S rRNA gene previously published [22] was followed. Initially, 300  
132 ticks were analysed, 50 from each of the six sampled locations listed above.

133 On the day of testing, each dried tick was placed in a 1.5 mL plastic tube and immersed in 300  
134  $\mu$ L of 0.7 mol/L  $\text{NH}_4\text{OH}$  overnight at room temperature. On the following day, the test tubes  
135 were heated at 95°C to 98°C for 20 minutes with closed caps, followed by 10 minutes with open  
136 caps. After the test tubes were cooled to room temperature and the carcass of the tick was  
137 discarded, 700  $\mu$ L of 95% ethanol and 30  $\mu$ L of 3 mol/L sodium acetate (Sigma) were added to  
138 each  $\text{NH}_4\text{OH}$  digestate. The precipitated crude DNA was spun down in the pellet after  
139 centrifugation at  $\sim 16,000 \times g$  for 5 minutes, washed in 1 mL of 70% ethanol, air dried, and re-  
140 dissolved in 100  $\mu$ L of tris(hydroxymethyl)aminomethane hydrochloride–EDTA (TE) buffer, pH  
141 7.4 (Sigma) by heating the DNA extract at 95°C to 98°C for 5 minutes. After centrifugation, 3  $\mu$ L  
142 of the crude DNA extract in the supernatant was used to initiate a primary PCR, followed by a  
143 same-nested PCR using a pair of M1/M2 borrelial genus-specific primers in a total 25  $\mu$ L low-  
144 temperature PCR mixture for a 30-cycle amplification at primary PCR, followed by another 30-  
145 cycle amplification at the same-nested PCR. In carrying out the same-nested PCR, a single pair  
146 of M1 (5'-ACGATGCACACTTGGTGTAA-3') and M2 (5'  
147 TCCGACTTATCACCGGCAGTC-3') primers were used for both primary PCR and nested PCR  
148 so that a small amount of the primary PCR products was re-amplified with the same pair of PCR

149 primers in a new PCR mixture [14]. An original target DNA segment in the PCR mixture might  
150 have been amplified for 60 cycles exponentially by the same pair of primers to increase the  
151 sensitivity of detection. The PCR amplicons of the 357-bp 16S rRNA gene segment of the *B.*  
152 *burgdorferi* sensu lato complex and the corresponding 358-bp 16S rRNA gene segment of the  
153 relapsing fever borreliae, both defined by the M1 and M2 PCR primer pair, were visualized by  
154 agarose gel electrophoresis of the nested PCR products. The same-nested PCR products were  
155 used as the template for Sanger reaction without purification.

156 For DNA sequencing, the positive nested PCR products were transferred by a micro-glass rod  
157 into a Sanger reaction tube containing 1  $\mu$ L of 10  $\mu$ molar sequencing primer, 1  $\mu$ L of the  
158 BigDye® Terminator (v 1.1/Sequencing Standard Kit), 3.5  $\mu$ L 5 $\times$  buffer, and 14.5  $\mu$ L water in a  
159 total volume of 20  $\mu$ L for 20 enzymatic primer extension/termination reaction cycles according  
160 to the protocol supplied by the manufacturer (Applied Biosystems, Foster City, CA, USA). After  
161 a dye-terminator cleanup with a Centri-Sep column (Princeton Separations, Adelphia, NJ, USA),  
162 the reaction mixture was loaded in an automated ABI 3130 four-capillary Genetic Analyzer for  
163 sequence analysis [14].

164 Sanger sequencing of positive 357/358 bp M1/M2 same-nested PCR products is capable of  
165 accurate identification of many species including, *B. valaisiana*, *B. afzelii*, *B. mayonii*, *B.*  
166 *spielmanii*, *B. lusitaniae*, *B. recurrentis*, *B. miyamotoi*, *B. hermsii*, *B. lonestari*, *B. coriaceae* and  
167 several other members in the relapsing fever group based on known species-specific single-  
168 nucleotide polymorphisms in the gene segment [14]. However, DNA sequencing of this 16S  
169 rRNA gene segment cannot distinguish *B. garinii* and *B. bavariensis* from *B. burgdorferi* sensu  
170 stricto or discriminate the heterogeneous strains within the species of *B. garinii* because their  
171 base sequences defined by the M1 and M2 PCR primers are identical.

172 Ireland is an island state geographically at the periphery of Europe. It is important at least for the  
173 current study to accurately determine the species or strains of the *B. burgdorferi* sensu lato  
174 detected in the ticks because the causative agents of Lyme borreliosis are highly heterogeneous  
175 in Europe. [1, 3-6] In North America, species differentiation among members of the *B.*  
176 *burgdorferi* sensu lato complex was initially considered unnecessary in a routine diagnostic  
177 laboratory because practically all *B. burgdorferi* sensu lato isolates detected in ticks and in  
178 clinical specimens in the United States were presumed to be *B. burgdorferi* sensu stricto [23].  
179 Nucleic acid-based diagnostic tests had been designed to detect *B. burgdorferi* sensu stricto only  
180 [24]. However, it is now recognized that the borrelia strains causing clinical Lyme disease in the  
181 United States are in fact quite diverse, especially after *B. miyamotoi* infection in humans was  
182 reported in 2013 [25]. According to the current *Viewpoints* of a group of Lyme disease experts, a  
183 “core genome” shared by all isolates capable of causing clinical Lyme borreliosis is needed for  
184 direct detection diagnosis even in the United States [26].

185 The “genus-specific” M1/M2 PCR primer pair can amplify a “core genome” of all pathogenic  
186 borreliae for the purpose of detection. However, to design a pair of reliable PCR primers to  
187 amplify a segment of borrelial 16S rRNA gene with single-nucleotide polymorphisms among  
188 various borrelial strains for further species or strain differentiation without co-amplification of  
189 the unwanted DNA extracted from other bacteria also present in the ticks turned out to be



190 challenging. In molecular diagnosis, the size of the PCR amplicons for detecting a small quantity  
191 of bacterial target DNA in a pool of non-target bacterial DNAs are usually below 300 bp in size  
192 [27-30] to avoid loss of sensitivity. It took several weeks of experimental work before we found  
193 3 PCR primers to generate a 282-bp heminested PCR amplicon useful as the template for Sanger  
194 sequencing to distinguish *B. garinii* from *B. burgdorferi* and to discriminate among the various  
195 *B. garinii* strains. The sequences of these 3 heminested PCR primers are listed as follows.

196 Primary PCR Forward Primer Bg1: 5'- GACGTTAATTTATGAATAAGC -3'

197 Primary PCR Reverse Primer Bg 6: 5'- TTAACACCAAGTGTGCATCGT – 3'

198 Heminested PCR Forward Primer Bg5: 5'- CGGGATTATTGGGCGTAAAGGGTGAG-3'

199 Heminested PCR Reverse Primer Bg 6: 5'- TTAACACCAAGTGTGCATCGT – 3'

200 Based on the reference sequences retrieved from the GenBank, the Bg5/Bg6 heminested PCR  
201 primer pair defines a 282 bp segment of the borrelial 16S rRNA gene with single-nucleotide  
202 polymorphisms which can be used to discriminate *Borrelia burgdorferi* strain B31  
203 (ID# CP019767), *Borrelia garinii* BgVir (ID# CP003151), *Borrelia garinii* strain Bernie  
204 (ID# D89900), *Borrelia garinii* strain T25 (ID# AB035388) and *Borrelia garinii* strain L20  
205 (ID# X85198) for the purpose of routine molecular diagnosis.

206 However, after the first 300 ticks were tested, it was realized that the free DNA of the borrelia  
207 16S rRNA gene in the crude DNA extract from the ticks was not stable on storage even at -20°  
208 C. By the time when the Bg5 and Bg6 heminested PCR primers were readied to be put into  
209 routine practice, the borrelial 16S rRNA gene DNA in 9 of the 12 samples initially found to be  
210 positive for *B. burgdorferi* sensu lato already degraded and were no longer amplifiable with any  
211 PCR primers. Therefore, an additional series of 50 ticks from each of the Portumna and  
212 Kilmacthomas samples were analysed for the specific purpose of species confirmation and strain  
213 determination of the *B. garinii* isolates.

## 214 Results

### 215 Multiple borrelial species found in *I. ricinus* ticks in Ireland

216 The same-nested PCR amplification of a 357/358 bp segment of borrelial 16S rRNA gene by the  
217 M1/M2 genus-specific PCR primers followed by Sanger sequencing of the nested PCR products  
218 [14] provided metagenomic evidence of *B. burgdorferi* sensu lato (B.b.s.l.), *B. valaisiana* and *B.*  
219 *miyamotoi* infection in the ticks collected in Ireland. Samples of the 16S rRNA gene sequencing  
220 with the M2 primer in support of these molecular diagnoses are illustrated by the 3 selected  
221 electropherograms presented in Fig 2.

### 222 Fig 2. Samples of computer-generated electropherograms of 16S rRNA gene sequences 223 representing the 3 borrelial groups detected in the ticks collected in Ireland.

224 (A) 221 bases Portumna area – *B. burgdorferi* sensu lato (GenBank ID# CP019767).

225 (B) 221 bases Killamey Area – *B. valaisiana* (GenBank ID# AB091815).

226 (C) 222 bases Portumna Area – *B. miyamotoi* (GenBank ID# KM007554).

227

## 228 **Strain diversity of *B. garinii***

229 The *B. burgdorferi* sensu lato isolates other than *B. valaisiana*, *B. spielmanii*, *B. mayonii* or *B.*  
230 *lusitaniae* cannot be speciated by the DNA sequence illustrated in Fig 2A, based on single-  
231 nucleotide polymorphisms of the 16S rRNA gene DNA sequences retrieved from the GenBank  
232 [14]. Sanger sequencing of the PCR amplicon with the reverse M1 primer proved that none of  
233 the *B. burgdorferi* sensu lato isolates were *B. afzelii*. A 177-base sequence of the 282-bp  
234 amplicon defined by the Bg5 and Bg6 heminested PCR primers distinguished the heterogeneous  
235 strains of *B. garinii* from *B. burgdorferi* and *B. bavariensis* due to the presence of single-  
236 nucleotide polymorphisms among strain BgVir {1}, strain 25 {2} and strain Bernie {3} of the *B.*  
237 *garinii* species and distinguished these strains from *B. burgdorferi* sensu stricto {4}. Alignment  
238 of these four 177-base reference sequences retrieved from the GenBank showing single-  
239 nucleotide polymorphisms is presented below with the ending 26-base G5 primer site underlined.

```
240 {1} CCTTCGCCTCCGGTATTCTTTCTGATATCAACAGATTCCACCCTTACACCAGAAATTCTAACTTCTCTATCAGACTCTAGAC  
241 {2} .....  
242 {3} .....T  
243 {4} .....  
244
```

```
245 {1} ATATAGTTTCCAACATAGTTCCACAGTTGAGCTGTGGTATTTTATGCATAGACTTATATATCCGCCTACTCACCCCTTTACGCC  
246 {2} .....C.....C.....  
247 {3} .....  
248 {4} .....G.....  
249
```

```
250 {1} CAATAATCCCG B. garinii Strain BgVir Sequence ID: CP003151 (Range:447801-447977)  
251 {2} ..... B. garinii Strain T25 Sequence ID: AB035388 (Range: 684-508)  
252 {3} ..... B. garinii Strain Bernie Sequence ID: D89900 (Range:692-516)  
253 {4} ..... B. burgdorferi strain B31 Sequence ID: CP019767 (Range: 444582-444758)  
254
```

255 The corresponding electropherograms of these four 177-base sequences (1-4), using the Bg6  
256 sequencing primer, are illustrated in Fig 3, arranged from top to bottom in numerical order of  
257 sequences 1-4 as Strain BgVir, Strain T25, Strain Bernie and *B. burgdorferi* strain B31.

258 **Fig 3. DNA sequencing electropherograms for distinguishing *B. garinii* strains.** (A) Strain  
259 BgVir. (B) Strain T25. (C) Strain Bernie. (D) *B. burgdorferi* strain B31.

260

261 A reverse sequencing with Bg5 primer of the 282-bp PCR amplicon confirmed that the isolates  
262 identified as strains BgVir were not strain SL20 (Sequence ID: X85198) because there is no  
263 single-nucleotide polymorphism located near the Bg6 primer site of the amplicon which is  
264 unique for strain SL20.

## 265 **Tick infection rates varied with locations**

266 As stated above, we conducted two surveys. Survey 1 consisted of 300 ticks collected in six  
267 locations showing 15 of the 300 ticks (5%) infected with *B. burgdorferi* sensu lato of which 3  
268 were confirmed to be *B. garinii* (2 being strain Bernie and 1 strain BgVir), 2 were *B. valaisiana*  
269 and 10 were not speciated. Survey 2 consisted of 100 ticks collected in two of the six locations  
270 previously surveyed, showing 5 of the 100 ticks (5%) infected by borrelial species, including 4

271 isolates of *B. garinii* (3 being strain BgVir and 1 being strain T25) and 1 isolate of *B. miyamotoi*.  
 272 The borrelial infection rates varied from 2% to 12 % depending on the locations of the tick  
 273 collection. It is noteworthy that all *B. burgdorferi* sensu lato isolates in Survey 2 were confirmed  
 274 to be *B. garinii* as the Bg5/BG6 PCR followed by Sanger sequencing for speciation was carried  
 275 out without delay after initial detection by M1/M2 PCR. The final species distributions in  
 276 different locations were summarized in Table 1.

277 **Table 1. Incidence of *Borrelia* species in Irish *Ixodes ricinus* tick samples (Nymphs).**

| Location                  | Sample size | No. Positive | % Positive | CI 95%                                     | <i>Borrelia</i> species                                                 |
|---------------------------|-------------|--------------|------------|--------------------------------------------|-------------------------------------------------------------------------|
| Killarney (Kerry)         | 50          | 1            | 2%         | (0% - 6%)                                  | <i>B. valaisiana</i>                                                    |
| Killmacthomas (Waterford) | 50          | 3            | 6%         | (0% - 13%)                                 | <i>B.b s.l</i>                                                          |
| Killmacthomas (Survey 2)  | 50          | 2            | 4%         | (0% - 9%)                                  | 1x <i>B. garinii</i> strain T25<br>1x <i>B. garinii</i> strain BgVir    |
| Portumna (Galway-South)   | 50          | 6            | 12%        | (3% - 21%)                                 | <i>B.b s.l</i>                                                          |
| Portumna (Survey 2)       | 50          | 3            | 6%         | (0% - 13%)                                 | 1x <i>B. miyamotoi</i><br>2x <i>B. garinii</i> strain BgVir             |
| Gelendalough (Wicklow)    | 50          | 1            | 2%         | (0% - 6%)                                  | <i>B. valaisiana</i>                                                    |
| Glenveagh (Donegal)       | 50          | 3            | 6%         | (0% - 13%)                                 | 1x <i>B. garinii</i> strain BgVir<br>2x <i>B. garinii</i> strain Bernie |
| Clifden (Galway-West)     | 50          | 1            | 2%         | (0% - 6%)                                  | <i>B.b s.l</i>                                                          |
| Total                     | 400         | 20           | 5%         | (3% - 7%)                                  |                                                                         |
| Of 20 infected ticks      |             |              |            |                                            |                                                                         |
|                           |             |              |            | <i>B. garinii</i>                          | 35% (7/20)                                                              |
|                           |             |              |            | <i>B. miyamotoi</i>                        | 5% (1/20)                                                               |
|                           |             |              |            | <i>B. valaisiana</i>                       | 10% (2/20)                                                              |
|                           |             |              |            | Percent other <i>B.b s.l</i> not speciated | 50% (10/20)                                                             |

278 *B.b s.l* = *Borrelia burgdorferi sensu lato*.

279 CI 95% = Confidence Interval for 95% probability.

280

### 281 Selection of PCR primers for 16S rRNA gene PCR and sequencing

282 For routine metagenomic DNA sequencing diagnosis of borrelial infections, it would be ideal to  
 283 use one single pair of broad-spectrum PCR primers which can amplify a highly conserved  
 284 segment of the 16S rRNA gene of all species in the *Borrelia* genus and also can discriminate  
 285 between different borrelial species, and does not amplify the DNAs of other environmental  
 286 bacteria which may co-exist in the sample, in a nested PCR setting to prepare templates for DNA  
 287 sequencing. However, such an ideal specific PCR primer pair is difficult to design. We use the



288 “genus-specific” M1/M2 primer pair to generate a PCR amplicon for Sanger reaction to detect all  
289 species of the B.b.s.l. complex and the relapsing fever borreliae, in particular *B. miyamotoi*. But  
290 the amplicons generated by the M1/M2 PCR primers do not contain the sequence  
291 polymorphisms for discriminating between certain species in the B.b.s.l. complex and between  
292 certain species of the relapsing fever borreliae. Hence, we chose a heminested PCR system to  
293 amplify an adjacent 282 bp segment defined by the Bg5 and Bg6 primers which is known to  
294 have single-nucleotide polymorphisms to prepare the template for further species differentiation  
295 by DNA sequencing (Fig 3). However, when the Bg5/Bg6 nested PCR products were used as the  
296 DNA sequencing template for confirmation of *B. miyamotoi* in tick samples, the  
297 electropherograms showed numerous ambiguous base calling peaks as a result of co-  
298 amplification of unwanted DNAs in the sample extract (Fig 4) whereas the sequencing  
299 electropherogram generated by the M1/M2 primer PCR products from the same tick extract  
300 showed no ambiguous base calling labels (Fig 2C).

301 **Fig 4. DNA sequencing of Bg5/Bg6 primer nested PCR products of *B. miyamotoi* 16S rRNA**  
302 **gene showing many ambiguous bases, compared to sequencing of M1/M2 primer nested**  
303 **PCR products of the same sample (see Fig 2C)**

304

305 It is well known that in using metagenomic 16S rRNA gene sequencing for target bacterial  
306 identification in samples containing a mixture of bacteria, the selected target variable regions of  
307 the 16S rRNA gene defined by different PCR primers have a major impact on the analysis results  
308 [31, 32].

### 309 **Degradation of 16S rRNA gene DNA in samples**

310 We also observed that free borrelial 16S rRNA gene DNA in crude extracts from the ticks was  
311 unstable even in TE buffer stored at -20°C for an extended period of time. For example, when  
312 the NH<sub>4</sub>OH extracts of the 50 ticks from the Portumna area were processed for M1/M2 same-  
313 nested PCR screening on July 20, 2018, 3 samples were positive for borrelial 16S rRNA gene  
314 DNA, with a robust 357/358 bp band on lanes 11, 15 and 25 (Fig 5) which eventually proved to  
315 be *B. garinii* strain BgVir, *B. miyamotoi* and *B. garinii* BgVir, respectively. When the NH<sub>4</sub>OH  
316 extracts of the 50 ticks from the Kilmacthomas area were processed for M1/M2 same-nested  
317 PCR screening on July 24, 2018, 2 samples were positive for borrelial 16S rRNA gene DNA,  
318 with a robust 357/358 bp band on lanes 372 and 382 (Fig 5) which eventually proved to be *B.*  
319 *garinii* strain BgVir and *B. garinii* strain T25, respectively. However, when the same-nested  
320 PCR was repeated on these 5 NH<sub>4</sub>OH extracts after 7 days and 3 days storage in a -20°C freezer,  
321 respectively, the 16S rRNA gene DNA in sample 11 was no longer detectable and the intensities  
322 of the nested PCR bands using the same extracts of samples 15, 25, 372 and 382 as primary PCR  
323 templates for amplification under identical experimental conditions decreased markedly over a  
324 period of 3-7 days, as demonstrated on the agarose gel dated July 27, 2018 (Fig 5). The image of  
325 the gel electrophoresis dated July 27, 2018 also showed that nested PCR is generally required for  
326 detection of borrelial infections by 16S rRNA gene analysis. Primary PCR products are usually  
327 invisible after gel electrophoresis.

328 **Fig 5. Images of agarose gel electrophoresis.** Images on July 20 and July 24, 2018 (A-C) show  
329 positive 357/358 bp borrelial 16S rRNA gene nested PCR amplicons in five positive tick samples  
330 on the day of DNA extraction (Lanes 11, 15, 25, 372 and 382). After storage of the DNA extracts  
331 at -20°C, the same DNA preparations were used to repeat primary and nested PCR on July 27,  
332 2018 (D), showing no nested PCR products for sample 11; the amount of nested PCR products  
333 on samples 15, 25, 372 and 382 was significantly reduced. N=negative control; P= positive  
334 *Borrelia coriaceae* control. M=molecular ruler. Note numerous non-specific PCR amplifications  
335 on panel for samples 371-390.

336

## 337 Discussion

338 DNA sequencing of the 16S ribosomal RNA gene is a well-established method to compare and  
339 identify bacteria [34]. Sequence analysis of the 16S rRNA gene is a reliable method for species  
340 determination of the *B. burgdorferi* sensu lato complex and the relapsing fever borreliae [34-38].

341 Routine metagenomic 16S rRNA gene sequencing test for spirochetemia was initially developed  
342 for the diagnosis of human Lyme disease in the United States [22, 39] where all isolates of  
343 pathogenic *B. burgdorferi* sensu lato detected were presumed to be *B. burgdorferi* sensu stricto  
344 [23]. Subsequently, a pair of broad-spectrum genus-specific M1/M2 primers was introduced to  
345 amplify a highly conserved 357/358 bp segment of the borrelial 16S rRNA gene as the template  
346 for Sanger sequencing to include *B. miyamotoi* as the target for detection [14] after *B. miyamotoi*  
347 was found in ticks [13] and in a patient [25]. In the era of precision medicine, microbiological  
348 diagnosis of bloodstream infections, such as borrelial spirochetemia, may rely on using accurate  
349 bacterial nucleic acid analysis to establish if blood culture is not an option [40]. Base calling  
350 electropherograms generated in the automated Sanger sequencing process as those shown in Fig  
351 2 and 3 may offer objective physical evidence for visual analysis in all nucleic acid-based  
352 diagnostic tests for infectious diseases, as proposed by some bacteriologists who are seriously  
353 concerned about the accuracies of molecular diagnosis for health care improvement [41,42].

354 Our study shows that *I. ricinus* ticks in Ireland are infected by a diversity of pathogenic borreliae.  
355 The degree of species and strain diversity may prove to be greater if the number of ticks being  
356 surveyed is increased. For example, in our two surveys *B. miyamotoi* and *B. garinii* strain T25  
357 were demonstrated only during Survey 2, but not in Survey 1 (Table 1). Importantly, our results  
358 demonstrate that *Borrelia*-infected tick populations exist in the east and south-east of Ireland,  
359 areas hitherto not considered to be significantly tick-infested and hence not areas of risk to  
360 humans for contraction of Lyme borreliosis.

361 Historically, the only surveys of *B. burgdorferi* sensu lato in ticks collected in Ireland were  
362 carried out more than 20 years ago, using reverse line blot (RLB) for detection and reporting  
363 infection rates to be between 3.5% and 26.7% depending on the locations of tick collection at  
364 that time [43, 44]. In the current study, we used metagenomic 16S rRNA gene sequencing to  
365 survey the *I. ricinus* ticks collected from the wooded areas in six counties of Ireland and found  
366 the overall rate of borrelial infection to be 5%, with a range from 2% to 12% depending on the  
367 locations of tick collection (Table 1). Comparing our results with those published 20 years ago is

368 difficult because there is a significant difference between the RLB and Sanger sequencing  
369 technologies in DNA test accuracy. Nevertheless, we found that 6% of the nymphs collected in  
370 Glenveagh were infected by two different strains of *B. garinii*, compared to 3.6% (5/141)  
371 infected of the nymphs collected in Glenveagh National Park which were reported to be positive  
372 for *B. valaisiana* (labeled as strain VS116) 20 years earlier [44]. As DNA dot-hybridization assay  
373 is prone to false positive results when no DNA sequencing confirmation is performed for  
374 validation [45], it is not possible to determine whether the local strains of *B. valaisiana* in the  
375 ticks in Glenveagh have been replaced by *B. garinii* over the past 20 years. As reported here,  
376 with Sanger sequencing it is beyond reasonable doubt that at least 3 pathogenic borrelial species,  
377 namely *B. garinii*, *B. valaisiana* and *B. miyamotoi*, are infecting the ticks collected in Ireland.  
378 The isolates of *B. garinii* are strain BgVir strain, strain Bernie or strain T25. This is the first time  
379 that *B. miyamotoi* was detected in a tick collected in Ireland although it was previously  
380 reported in *I. ricinus* ticks in Britain [46].

381 Extracellular bacterial 16S rRNA gene DNA is prone to degradation in the presence of  
382 environmental substances [47], a phenomenon which was recognized when borrelial 16S rRNA  
383 gene DNA in human clinical specimens was studied [48] and was also observed in the current  
384 study on borrelial DNA extracts from infected ticks (Fig 5). However, this kind of DNA  
385 degradation seems to be not inevitable. For example, as shown in Table 1, all of the 3 positive  
386 extracts of the ticks collected from Glenveagh in Survey 1 contained adequate preserved 16S  
387 rRNA gene DNA to be further speciated as *B. garinii* after initially being grouped under the *B.*  
388 *burgdorferi* sensu lato complex whereas all the extracts from the ticks collected from other  
389 locations lost their amplifiable 16S rRNA gene DNA under identical storage conditions. For  
390 comparison, all four extracts of the ticks in Survey 2 found to be positive for *B. burgdorferi*  
391 sensu lato contained adequate 16S rRNA gene DNA for speciation which confirmed that the  
392 isolates initially diagnosed as *B. burgdorferi* sensu lato were in fact strains of *B. garinii* when the  
393 speciation PCR was carried out within 24 hours. To avoid DNA degradation when using  
394 metagenomic sequencing of borrelial 16S rRNA gene for molecular diagnosis, PCR  
395 amplification should be carried out without delay after NH<sub>4</sub>OH extraction.

396 For the purpose of patient care, it is probably not necessary to determine the species or strain of  
397 the borrelia detected in the blood sample of a patient suffering from acute *B. burgdorferi* sensu  
398 lato or *B. miyamotoi* infection confirmed by DNA sequencing in order to initiate timely  
399 antibiotic treatment. But, for serological diagnosis a knowledge of the borrelial species and  
400 strains carried by the human-biting ticks collected in the endemic areas is crucial since  
401 polymorphism of ospC [9-11] and variation of the VlsE antigens among species and strains of *B.*  
402 *burgdorferi* sensu lato [49] have been well documented in the literature. There is limited  
403 information regarding the sensitivity of commercial tests for different species of borrelia. The  
404 manufacturers of Western Blot antibody tests specify the target species. In Europe these are  
405 typically *B. afzelii*, *B. burgdorferi* and *B. garinii*. A study of the most frequently used C6  
406 synthetic peptide ELISA test for initial screening does appear to have variable sensitivity for  
407 some species [50] but with no data available for many of the European species including *B.*  
408 *valaisiana* identified as prevalent in Ireland in this study.

409 In summary, our study confirms that the genus-specific M1/M2 PCR primers can amplify a  
410 highly conserved segment of the borrelial 16S rRNA gene for Sanger sequencing-based  
411 molecular diagnosis of tick-borne borreliae. Three species of *borrelia* were identified with *B.*  
412 *garinii* the most common (60% of those speciated), followed by *B. valaisiana* (20%), and for the  
413 first time in Ireland *B. miyamotoi* (10%) has been identified. *Borrelia* DNA was identified in  
414 12% of the ticks collected in the Portumna area from the first survey, and in up to 6% of the ticks  
415 in Glenveagh and Kilmathomas areas. Expanded surveillance of the species and strains of the  
416 borreliae among human-biting ticks in Ireland is needed to ensure that the antigens used for the  
417 serology tests do contain the epitopes matching the antibodies elicited by the borrelial species  
418 and strains in the ticks cohabitating in the same environment.

419

## 420 **Author Contributions**

421

422 **Conceptualization:** John S. Lambert, John Eoin Healy.

423 **Data Curation:** John Eoin Healy, Sin Hang Lee.

424 **Formal Analysis:** Michael John Cook.

425 **Investigation:** John S. Lambert, John Eoin Healy, Sin Hang Lee.

426 **Methodology:** Sin Hang Lee.

427 **Project Administration:** John S. Lambert, Gordana Avramovic.

428 **Resources:** John S. Lambert, Sin Hang Lee.

429 **Supervision:** John S. Lambert.

430 **Validation:** John, S. Lambert.

431 **Visualization:** John S. Lambert, Ross Murtagh.

432 **Writing – Original Draft Preparation:** John S. Lambert,

433 **Writing – Review & Editing:** John S. Lambert, Michael John Cook, John Eoin Healy, Ross  
434 Murtagh, Gordana Avramovic, Sin Hang Lee.

435

## 436 **References**

- 437 1. Rudenko N, Golovchenko M, Grubhoffer L, Oliver JH Jr. Updates on *Borrelia burgdorferi* sensu  
438 lato complex with respect to public health. *Ticks Tick Borne Dis.* 2011 Sep;2(3):123-8.
- 439 2. Bunikis J, Tsao J, Garpmo U, Berglund J, Fish D, Barbour AG. Typing of *Borrelia relapsing*  
440 fever group strains. *Emerg Infect Dis.* 2004 Sep;10(9):1661-4.
- 441 3. Rijpkema SG, Tazelaar DJ, Molkenboer MJ, Noordhoek GT, Plantinga G, Schouls LM,  
442 Schellekens JF. Detection of *Borrelia afzelii*, *Borrelia burgdorferi* sensu stricto, *Borrelia garinii*

- 443 and group VS116 by PCR in skin biopsies of patients with erythema migrans and acrodermatitis  
444 chronica atrophicans. *Clin Microbiol Infect.* 1997 Feb;3(1):109-116.
- 445 4. Rudenko, N. et al., 2009. Molecular detection of *Borrelia bissetii* DNA in serum samples from  
446 patients in the Czech Republic with suspected borreliosis. *FEMS microbiology letters*, 292(2),  
447 pp.274–81
- 448 5. Wang G, Liveris D, Mukherjee P, Jungnick S, Margos G, Schwartz I. Molecular Typing of  
449 *Borrelia burgdorferi*. *Curr Protoc Microbiol.* 2014 Aug 1;34:12C.5.1-31
- 450 6. Ivanova, L.B. et al., 2014. *Borrelia chilensis*, a new member of the *Borrelia burgdorferi* sensu lato  
451 complex that extends the range of this genospecies in the Southern Hemisphere. *Environmental*  
452 *microbiology*, 16(4), pp.1069–80
- 453 7. Crowder CD, Carolan HE, Rounds MA, Honig V, Mothes B, Haag H, Nolte O, Luft BJ,  
454 Grubhoffer L, Ecker DJ, Schutzer SE, Eshoo MW. Prevalence of *Borrelia miyamotoi* in Ixodes  
455 ticks in Europe and the United States. *Emerg Infect Dis.* 2014 Oct;20(10):1678-82.
- 456 8. Steere AC, Strle F. 2016 Dec 15;2:16090, Wormser GP, Hu LT, Branda JA, Hovius JW, Li X,  
457 Mead PS. Lyme borreliosis. *Nat Rev Dis Primers.* 2016 Dec 15;2:16090.
- 458 9. Barbour AG, Restrepo BI. Antigenic variation in vector-borne pathogens. *Emerg Infect Dis.* 2000  
459 Sep-Oct;6(5):449-57. Review.
- 460 10. Theisen M, Frederiksen B, Lebech AM, Vuust J, Hansen K. Polymorphism in *ospC* gene of  
461 *Borrelia burgdorferi* and immunoreactivity of *OspC* protein: implications for taxonomy and for  
462 use of *OspC* protein as a diagnostic antigen. *J Clin Microbiol.* 1993;31:2570-6.
- 463 11. Wang IN, Dykhuizen DE, Qiu W, Dunn JJ, Bosler EM, Luft BJ. Genetic diversity of *ospC* in a  
464 local population of *Borrelia burgdorferi* sensu stricto. *Genetics.* 1999 Jan;151(1):15-30.
- 465 12. Han S, Hickling GJ, Tsao JI. High Prevalence of *Borrelia miyamotoi* among Adult Blacklegged  
466 Ticks from White-Tailed Deer. *Emerg Infect Dis.* 2016 Feb;22(2):316-8.
- 467 13. Barbour AG, Bunikis J, Travinsky B, Hoen AG, Diuk-Wasser MA, Fish D, Tsao JI. Niche  
468 partitioning of *Borrelia burgdorferi* and *Borrelia miyamotoi* in the same tick vector and  
469 mammalian reservoir species. *Am J Trop Med Hyg.* 2009 Dec;81(6):1120-31.
- 470 14. Lee SH, Vigliotti JS, Vigliotti VS, Jones W, Moorcroft TA, Lantsman K. DNA sequencing  
471 diagnosis of off-season spirochetemia with low bacterial density in *Borrelia burgdorferi* and  
472 *Borrelia miyamotoi* infections. *Int J Mol Sci.* 2014 Jun 25;15(7):11364-86.
- 473 15. Prescott CD, Dahlberg AE. A single base change at 726 in 16S rRNA radically alters the pattern  
474 of proteins synthesized in vivo. *EMBO J.* 1990 Jan;9(1):289-94.
- 475 16. Prescott CD, Göringer HU. A single mutation in 16S rRNA that affects mRNA binding and  
476 translation-termination. *Nucleic Acids Res.* 1990 Sep 25;18(18):5381-6.
- 477 17. Shi X, Chiu K, Ghosh S, Joseph S. Bases in 16S rRNA important for subunit association, tRNA  
478 binding, and translocation. *Biochemistry.* 2009 Jul 28;48(29):6772-82.
- 479 18. Nessar R, Reyrat JM, Murray A, Gicquel B. Genetic analysis of new 16S rRNA mutations  
480 conferring aminoglycoside resistance in *Mycobacterium abscessus*. *J Antimicrob Chemother.*  
481 2011 Aug;66(8):1719-24.
- 482 19. Watanabe S, Matsumura K, Iwai H, Funatogawa K, Haishima Y, Fukui C, Okumura K, Kato-  
483 Miyazawa M, Hashimoto M, Teramoto K, Kirikae F, Miyoshi-Akiyama T, Kirikae T. A Mutation  
484 in the 16S rRNA Decoding Region Attenuates the Virulence of *Mycobacterium tuberculosis*.  
485 *Infect Immun.* 2016 Jul 21;84(8):2264-2273.
- 486 20. Janda JM, Abbott SL. 16S rRNA gene sequencing for bacterial identification in the diagnostic  
487 laboratory: pluses, perils, and pitfalls. *J Clin Microbiol.* 2007 Sep;45(9):2761-4.



- 488 21. Norris SJ, Barbour AG, Fish D, Diuk-Wasser MA. Response to Esteve-Gassent et al.: flaB  
489 sequences obtained from Texas PCR products are identical to the positive control strain *Borrelia*  
490 *burgdorferi* B31. *Parasit Vectors*. 2015 Jun 9;8:310.
- 491 22. Lee SH, Vigliotti VS, Vigliotti JS, Jones W, Pappu S. Increased sensitivity and specificity of  
492 *Borrelia burgdorferi* 16S ribosomal DNA detection. *Am J Clin Pathol*. 2010 Apr;133(4):569-76.
- 493 23. Feder HM Jr, Johnson BJ, O'Connell S, Shapiro ED, Steere AC, Wormser GP; Ad Hoc  
494 International Lyme Disease Group, Agger WA, Artsob H, Auwaerter P, Dumler JS, Bakken JS,  
495 Bockenstedt LK, Green J, Dattwyler RJ, Munoz J, Nadelman RB, Schwartz I, Draper T,  
496 McSweeney E, Halperin JJ, Klempner MS, Krause PJ, Mead P, Morshed M, Porwancher R,  
497 Radolf JD, Smith RP Jr, Sood S, Weinstein A, Wong SJ, Zemel L. A critical appraisal of "chronic  
498 Lyme disease". *N Engl J Med*. 2007 Oct 4;357(14):1422-30.
- 499 24. Marconi RT Garon CF . Development of polymerase chain reaction primer sets for diagnosis of  
500 Lyme disease and for species-specific identification of Lyme disease isolates by 16S rRNA  
501 signature nucleotide analysis. *J Clin Microbiol* . 1992;30:2830–2834.
- 502 25. Gugliotta JL, Goethert HK, Berardi VP, Telford SR 3rd. Meningoencephalitis from *Borrelia*  
503 *miyamotoi* in an immunocompromised patient. *N Engl J Med*. 2013 Jan 17;368(3):240-5.
- 504 26. Schutzer SE, Body BA, Boyle J, Branson BM, Dattwyler RJ, Fikrig E, Gerald NJ, Gomes-Solecki  
505 M, Kintrup M, Ledizet M, Levin AE, Lewinski M, Liotta LA, Marques A, Mead PS, Mongodin  
506 EF, Pillai S, Rao P, Robinson WH, Roth KM, Schriefer ME, Slezak T, Snyder JL, Steere AC,  
507 Witkowski J, Wong SJ, Branda JA. Direct Diagnostic Tests for Lyme Disease. *Clin Infect Dis*.  
508 2018 Oct 11. doi: 10.1093/cid/ciy614. [Epub ahead of print]
- 509 27. Way JS, Josephson KL, Pillai SD, Abbaszadegan M, Gerba CP, Pepper IL. Specific detection of  
510 *Salmonella* spp. by multiplex polymerase chain reaction. *Appl Environ Microbiol*. 1993  
511 May;59(5):1473-9.
- 512 28. Abbaszadegan M, Huber MS, Gerba CP, Pepper IL. Detection of enteroviruses in groundwater  
513 with the polymerase chain reaction. *Appl Environ Microbiol*. 1993 May;59(5):1318-24.
- 514 29. Bej AK, Steffan RJ, DiCesare J, Haff L, Atlas RM. Detection of coliform bacteria in water by  
515 polymerase chain reaction and gene probes. *Appl Environ Microbiol*. 1990 Feb;56(2):307-14.
- 516 30. Aguero-Rosenfeld ME, Wang G, Schwartz I, Wormser GP. Diagnosis of lyme borreliosis. *Clin*  
517 *Microbiol Rev*. 2005 Jul;18(3):484-509. Review.
- 518 31. Rintala A, Pietilä S, Munukka E, Eerola E, Pursiheimo JP, Laiho A, Pekkala S, Huovinen P. Gut  
519 Microbiota Analysis Results Are Highly Dependent on the 16S rRNA Gene Target Region,  
520 Whereas the Impact of DNA Extraction Is Minor. *J Biomol Tech*. 2017 Apr;28(1):19-30.
- 521 32. Klindworth A, Pruesse E, Schweer T, Peplies J, Quast C, Horn M, Glöckner FO. Evaluation of  
522 general 16S ribosomal RNA gene PCR primers for classical and next-generation sequencing-  
523 based diversity studies. *Nucleic Acids Res*. 2013 Jan 7;41(1):e1.
- 524 33. CDC. MicrobeNet. <https://www.cdc.gov/microbenet/about.html>
- 525 34. Fukunaga M, Hamase A, Okada K, Nakao M. *Borrelia tanukii* sp. nov. and *Borrelia turdae* sp.  
526 nov. found from ixodid ticks in Japan: rapid species identification by 16S rRNA gene-targeted  
527 PCR analysis. *Microbiol Immunol*. 1996;40(11):877-81.
- 528 35. Le Fleche A, Postic D, Girardet K, Peter O, Baranton G. Characterization of *Borrelia lusitaniae*  
529 sp. nov. by 16S ribosomal DNA sequence analysis. *Int J Syst Bacteriol*. 1997 Oct;47(4):921-5.
- 530 36. Marconi RT, Garon CF. Identification of a third genomic group of *Borrelia burgdorferi* through  
531 signature nucleotide analysis and 16S rRNA sequence determination. *J Gen Microbiol*. 1992  
532 Mar;138(3):533-6.

- 533 37. Wang G1, van Dam AP, Le Fleche A, Postic D, Peter O, Baranton G, de Boer R, Spanjaard L,  
534 Dankert J. Genetic and phenotypic analysis of *Borrelia valaisiana* sp. nov. (*Borrelia* genomic  
535 groups VS116 and M19). *Int J Syst Bacteriol*. 1997 Oct;47(4):926-32.
- 536 38. Platonov AE, Karan LS, Kolyasnikova NM, Makhneva NA, Toporkova MG, Maleev VV, Fish D,  
537 Krause PJ. Humans infected with relapsing fever spirochete *Borrelia miyamotoi*, Russia. *Emerg*  
538 *Infect Dis*. 2011 Oct;17(10):1816-23.
- 539 39. Lee SH, Vigliotti VS, Vigliotti JS, Jones W, Williams J, Walshon J. Early Lyme disease with  
540 spirochetemia - diagnosed by DNA sequencing. *BMC Res Notes*. 2010 Nov 1;3:273.
- 541 40. Rello J, van Engelen TSR, Alp E, Calandra T, Cattoir V, Kern WV, Netea MG, Nseir S, Opal  
542 SM, van de Veerdonk FL, Wilcox MH, Wiersinga WJ. Towards precision medicine in sepsis: a  
543 position paper from the European Society of Clinical Microbiology and Infectious Diseases. *Clin*  
544 *Microbiol Infect*. 2018 Mar 24. pii: S1198-743X(18)30221-0. doi: 10.1016/j.cmi.2018.03.011.  
545 [Epub ahead of print]
- 546 41. Hakovirta JR, Prezioso S, Hodge D, Pillai SP, Weigel LM. Identification and Analysis of  
547 Informative Single Nucleotide Polymorphisms in 16S rRNA Gene Sequences of the *Bacillus*  
548 *cereus* Group. *J Clin Microbiol*. 2016 Nov;54(11):2749-2756. Epub 2016 Aug 31.
- 549 42. Peacock S. Health care: Bring microbial sequencing to hospitals. *Nature*. 2014 May  
550 29;509(7502):557-9.
- 551 43. Kirstein F, Rijpkema S, Molkenboer M, Gray JS. Local variations in the distribution and  
552 prevalence of *Borrelia burgdorferi sensu lato* genomospecies in *Ixodes ricinus* ticks. *Appl*  
553 *Environ Microbiol*. 1997 Mar;63(3):1102-6.
- 554 44. Kirstein F, Rijpkema S, Molkenboer M, Gray JS. The distribution and prevalence of *B.*  
555 *burgdorferi* genomospecies in *Ixodes ricinus* ticks in Ireland. *Eur J Epidemiol*. 1997;13:67-72.
- 556 45. Diegutis PS, Keirnan E, Burnett L, Nightingale BN, Cossart YE. False-positive results with  
557 hepatitis B virus DNA dot-hybridization in hepatitis B surface antigen-negative specimens. *J Clin*  
558 *Microbiol*. 1986 Apr;23(4):797-9.
- 559 46. Hansford KM, Fonville M, Jahfari S, Sprong H, Medlock JM. *Borrelia miyamotoi* in host-seeking  
560 *Ixodes ricinus* ticks in England. *Epidemiol Infect*. 2015 Apr;143(5):1079-87. doi:  
561 10.1017/S0950268814001691. Epub 2014 Jul 14.
- 562 47. Corinaldesi C, Danovaro R, Dell'Anno A. Simultaneous recovery of extracellular and  
563 intracellular DNA suitable for molecular studies from marine sediments. *Appl Environ Microbiol*.  
564 2005 Jan;71(1):46-50.
- 565 48. Persing DH, Rutledge BJ, Rys PN, Podzorski DS, Mitchell PD, Reed KD, Liu B, Fikrig E,  
566 Malawista SE. Target imbalance: disparity of *Borrelia burgdorferi* genetic material in synovial  
567 fluid from Lyme arthritis patients. *J Infect Dis*. 1994 Mar;169(3):668-72.
- 568 49. Wang D, Botkin DJ, Norris SJ. Characterization of the vls antigenic variation loci of the Lyme  
569 disease spirochaetes *Borrelia garinii* Ip90 and *Borrelia afzelii* ACAI. *Mol Microbiol*. 2003  
570 Mar;47(5):1407-1
- 571 50. Tjernberg I, Sillanpää H, Seppälä I, Eliasson I, Forsberg P, Lahdenne P. Antibody responses to  
572 borrelia IR6 peptide variants and the C6 peptide in Swedish patients with erythema migrans. *Int J*  
573 *Med Microbiol*. 2009;299: 439-446  
574  
575

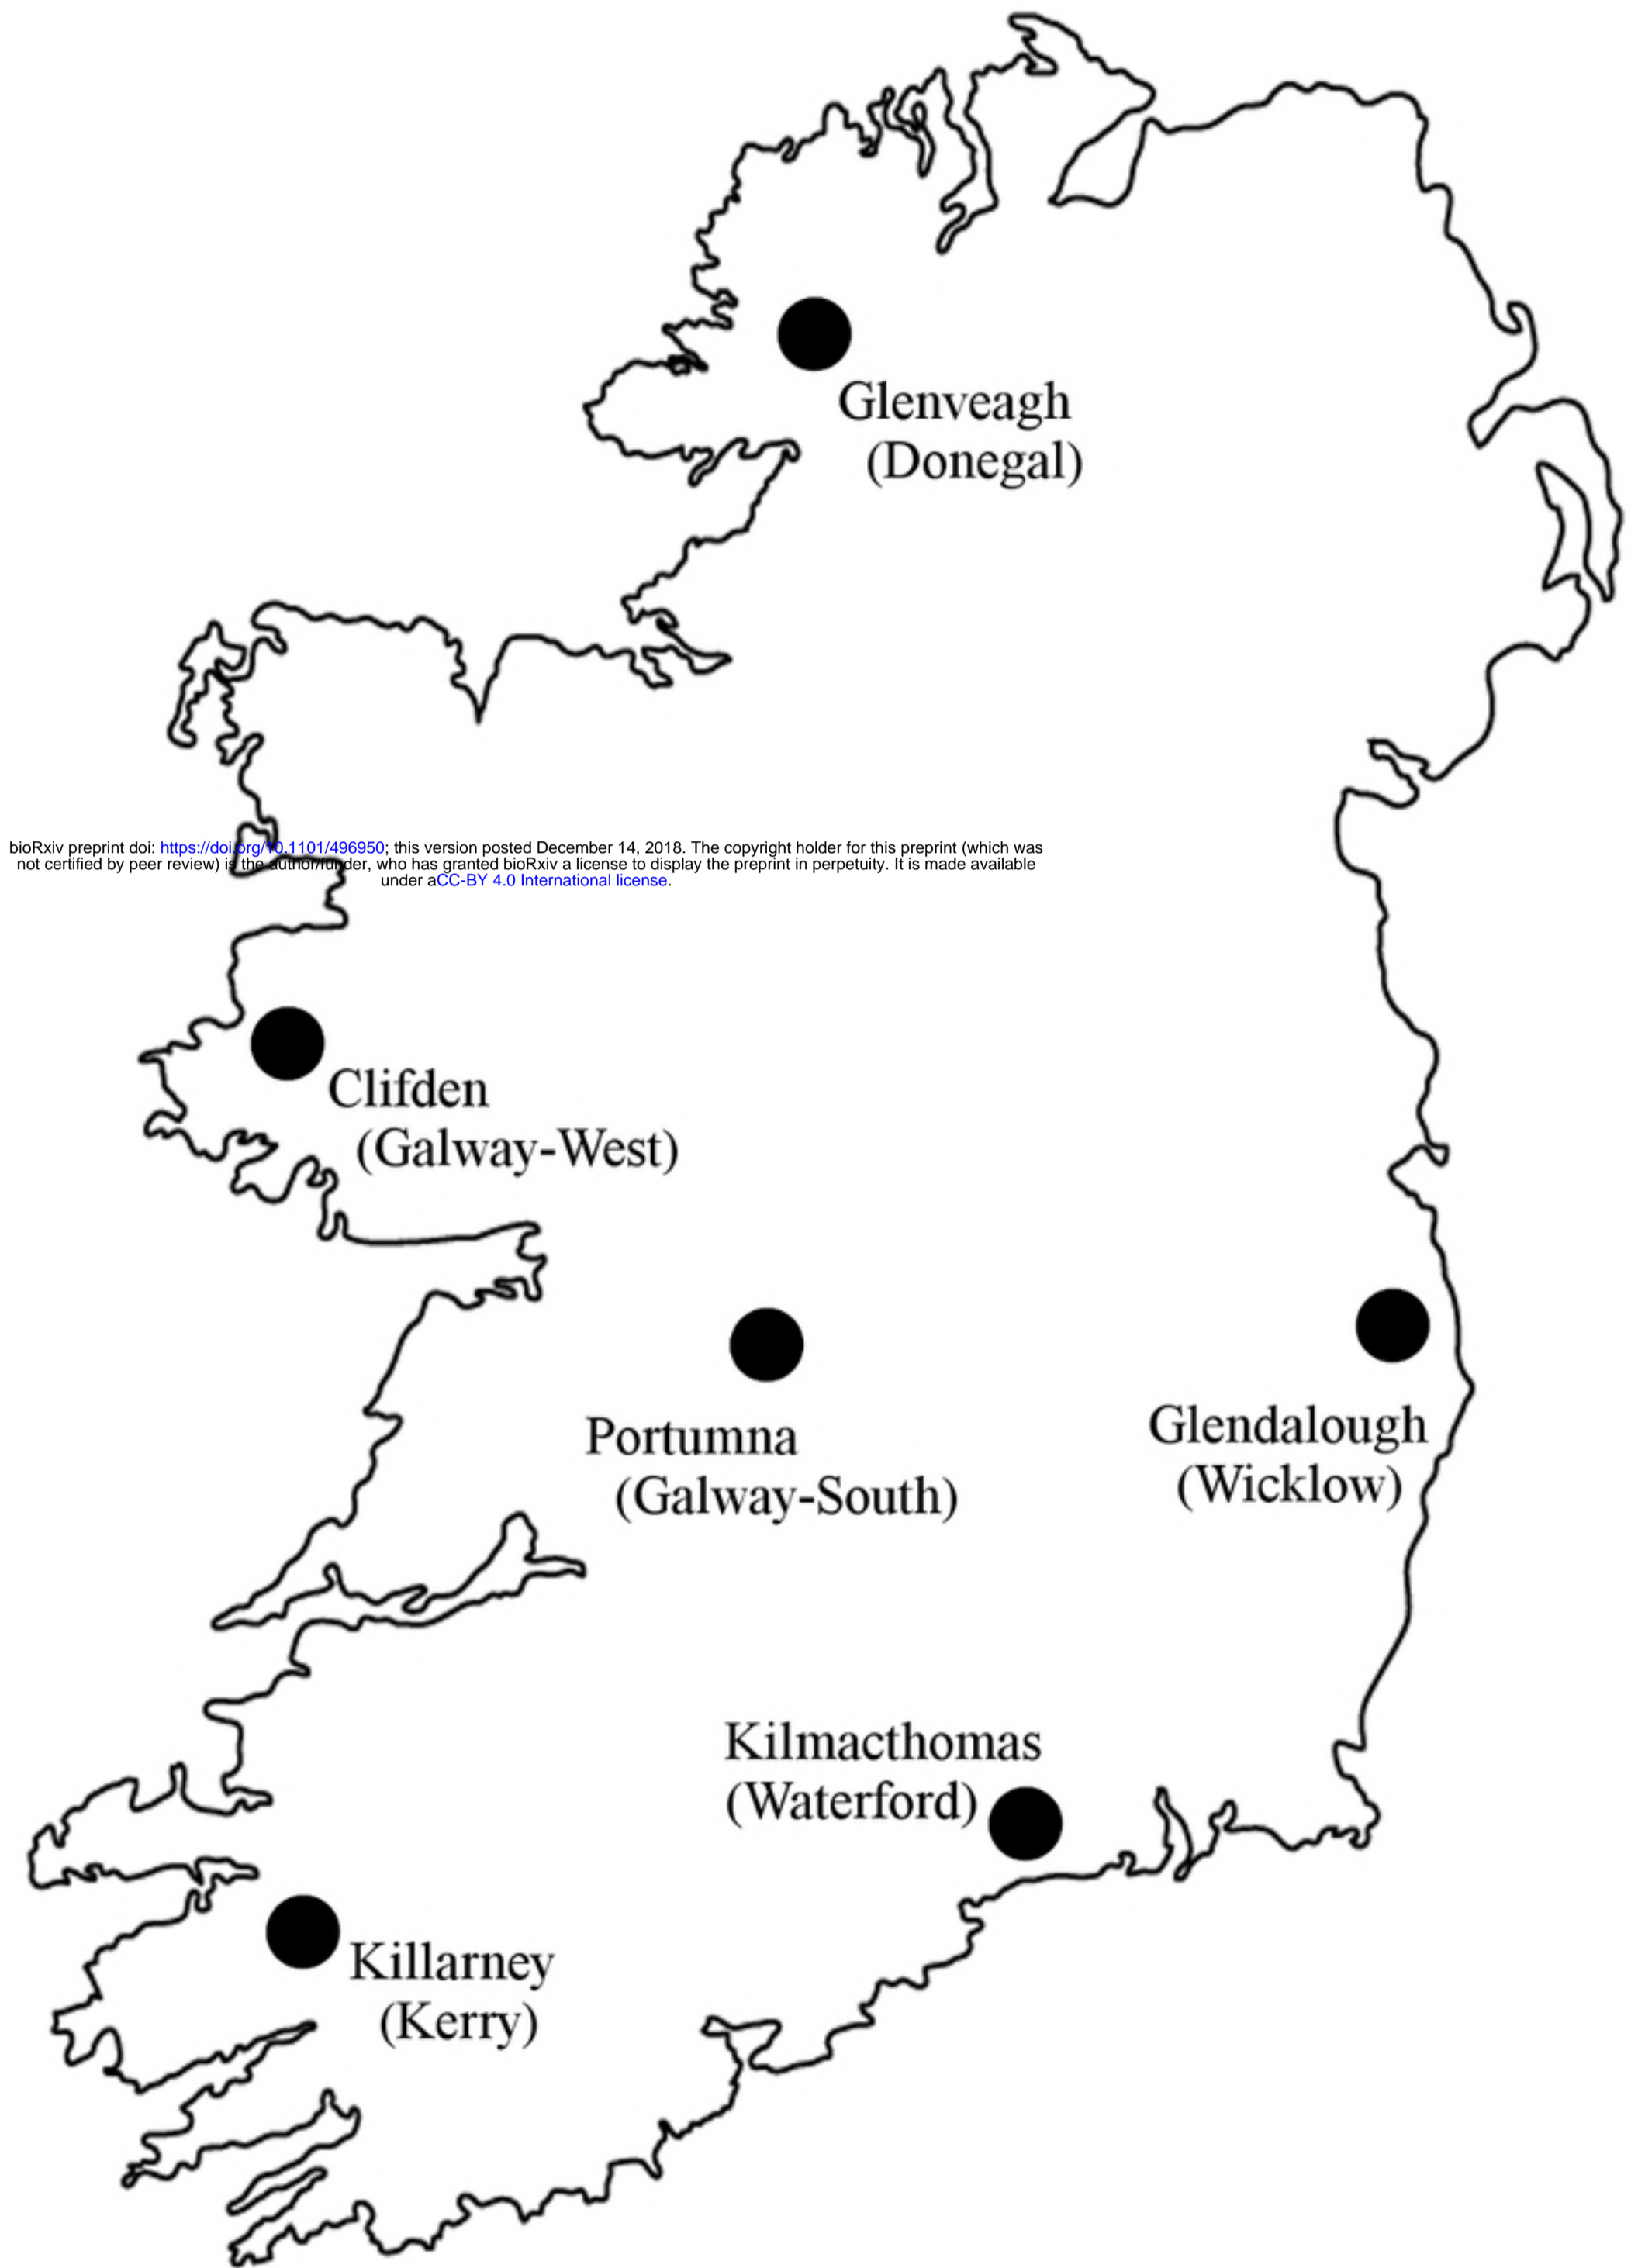

Fig 1



**A**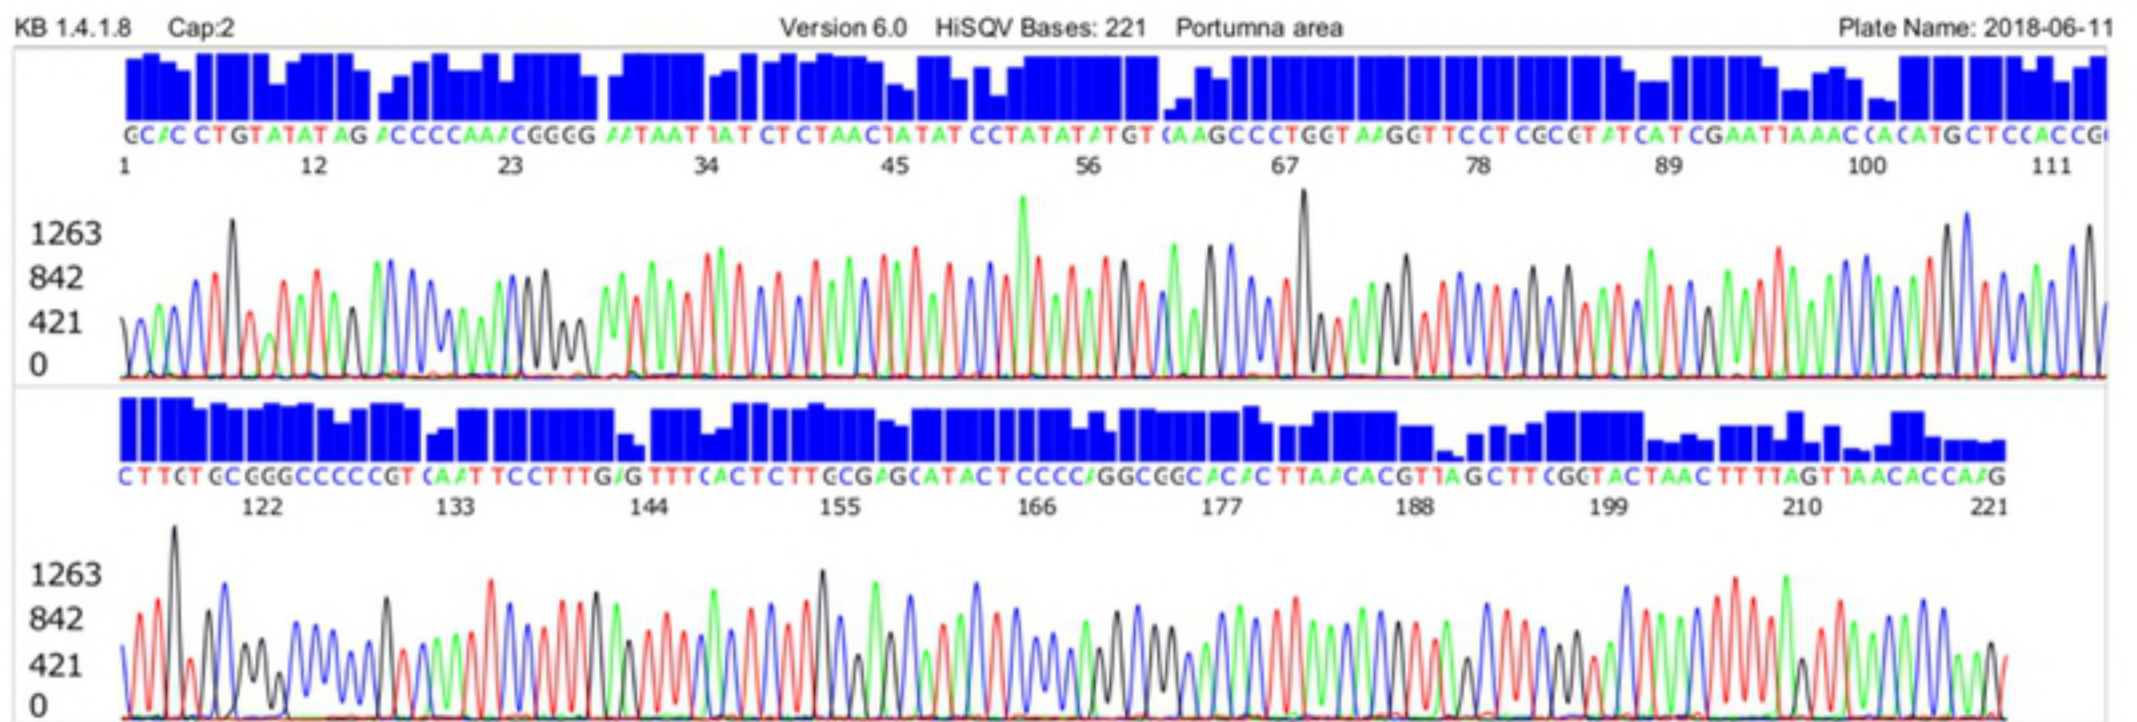

bioRxiv preprint doi: <https://doi.org/10.1101/496950>; this version posted December 14, 2018. The copyright holder for this preprint (which was not certified by peer review) is the author/funder, who has granted bioRxiv a license to display the preprint in perpetuity. It is made available under aCC-BY 4.0 International license.

**B**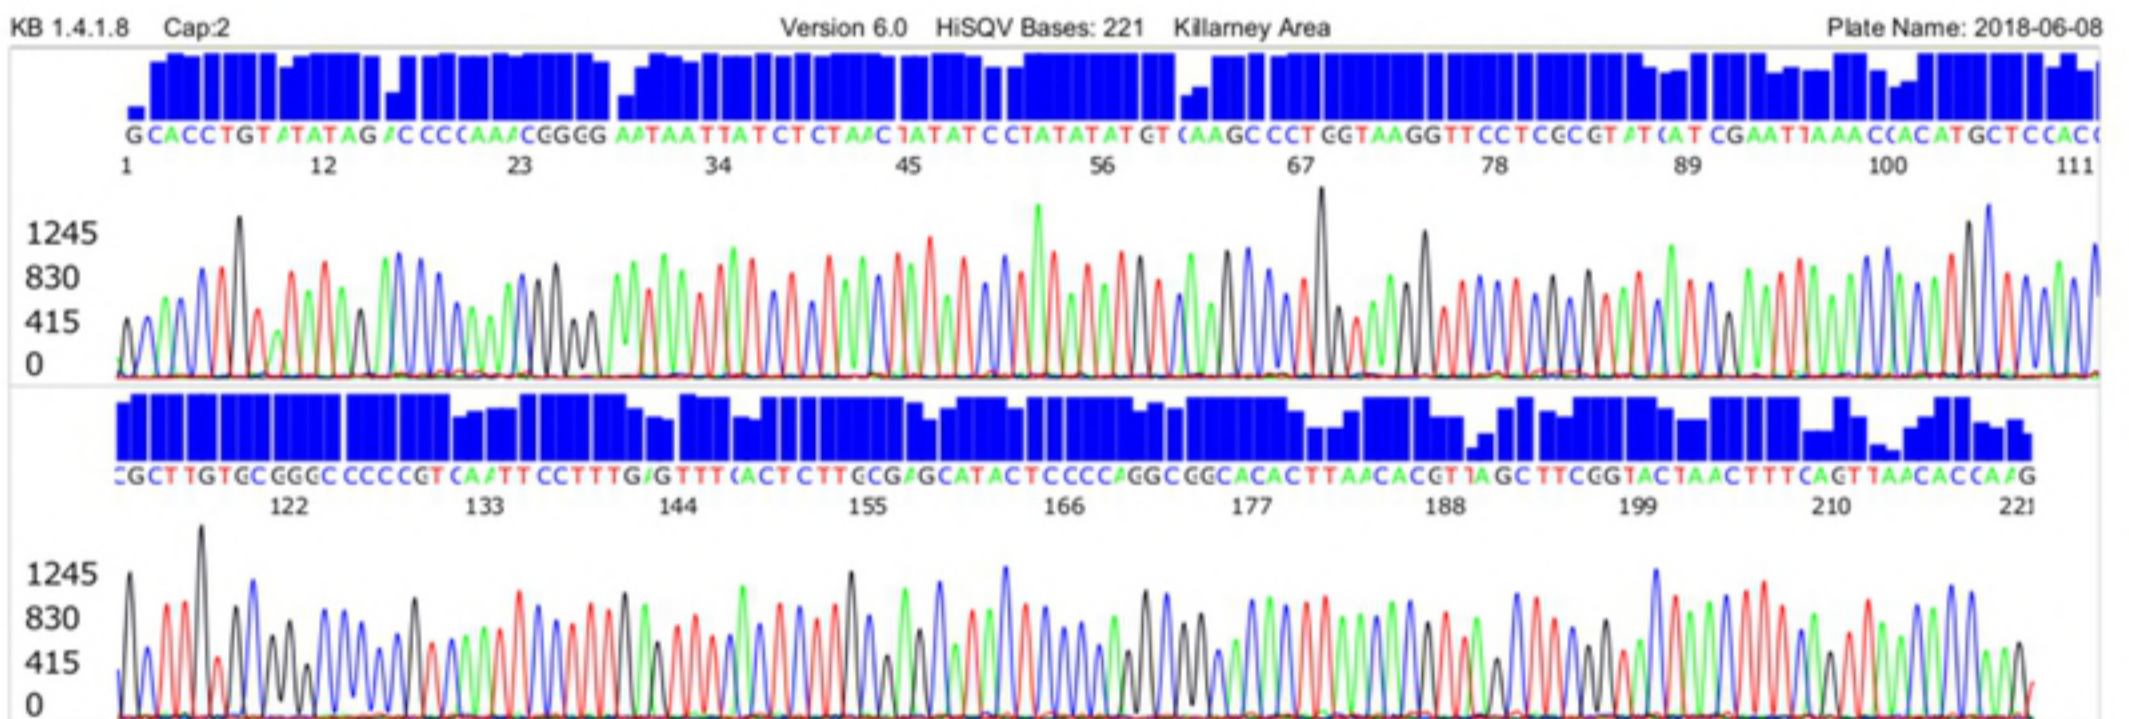**C**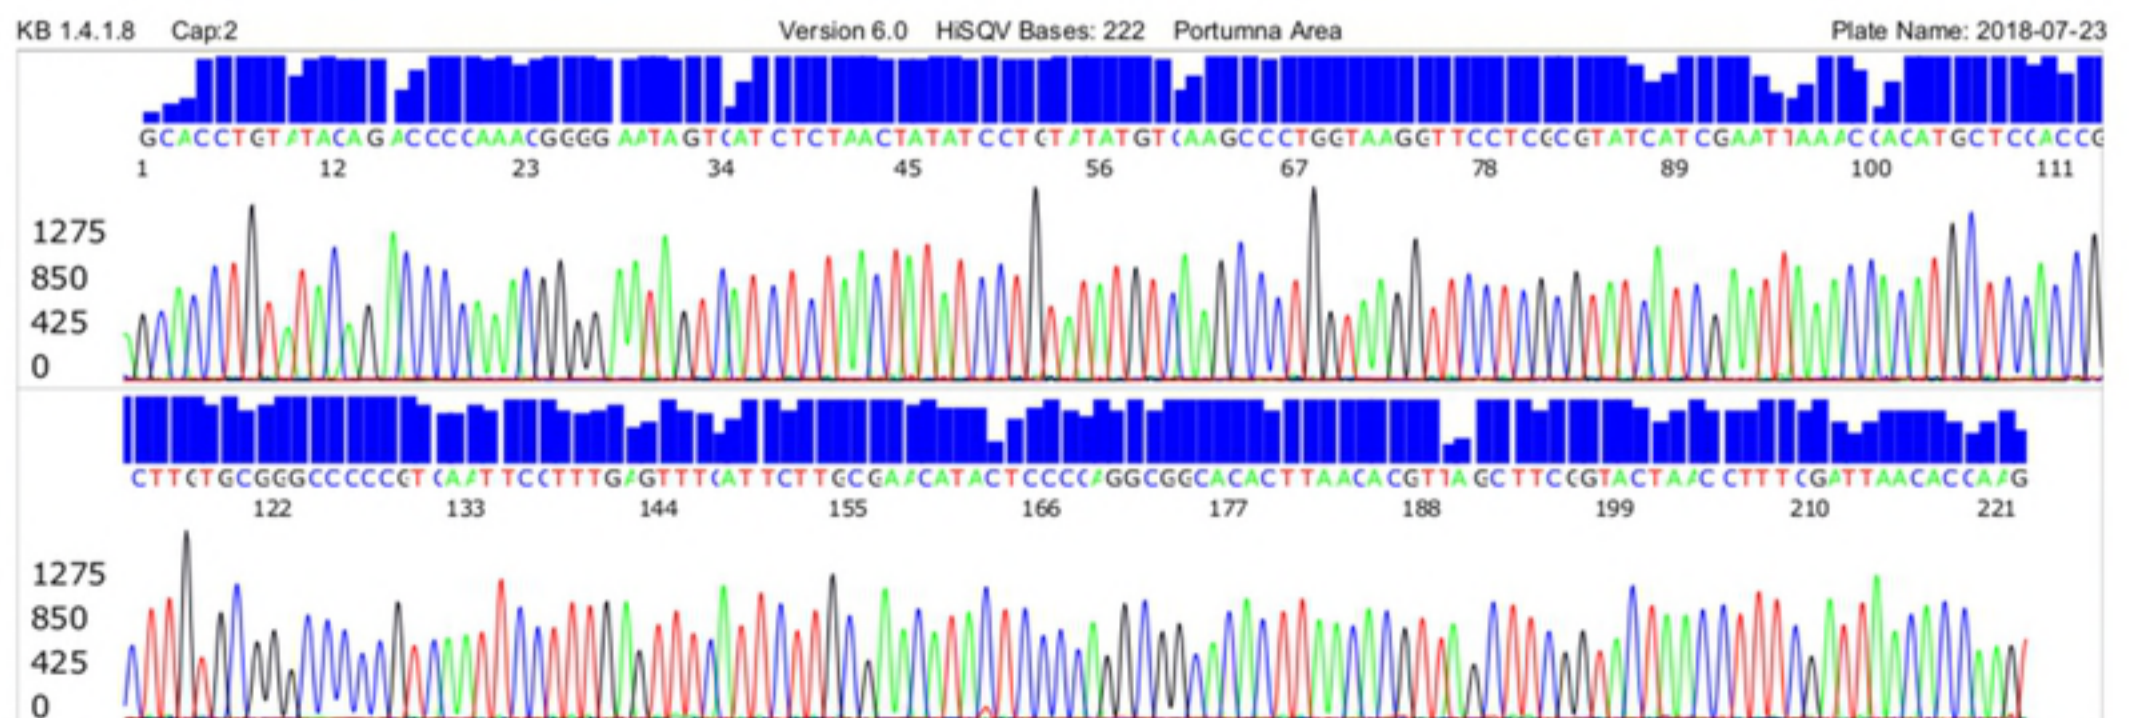

Fig 2



**A**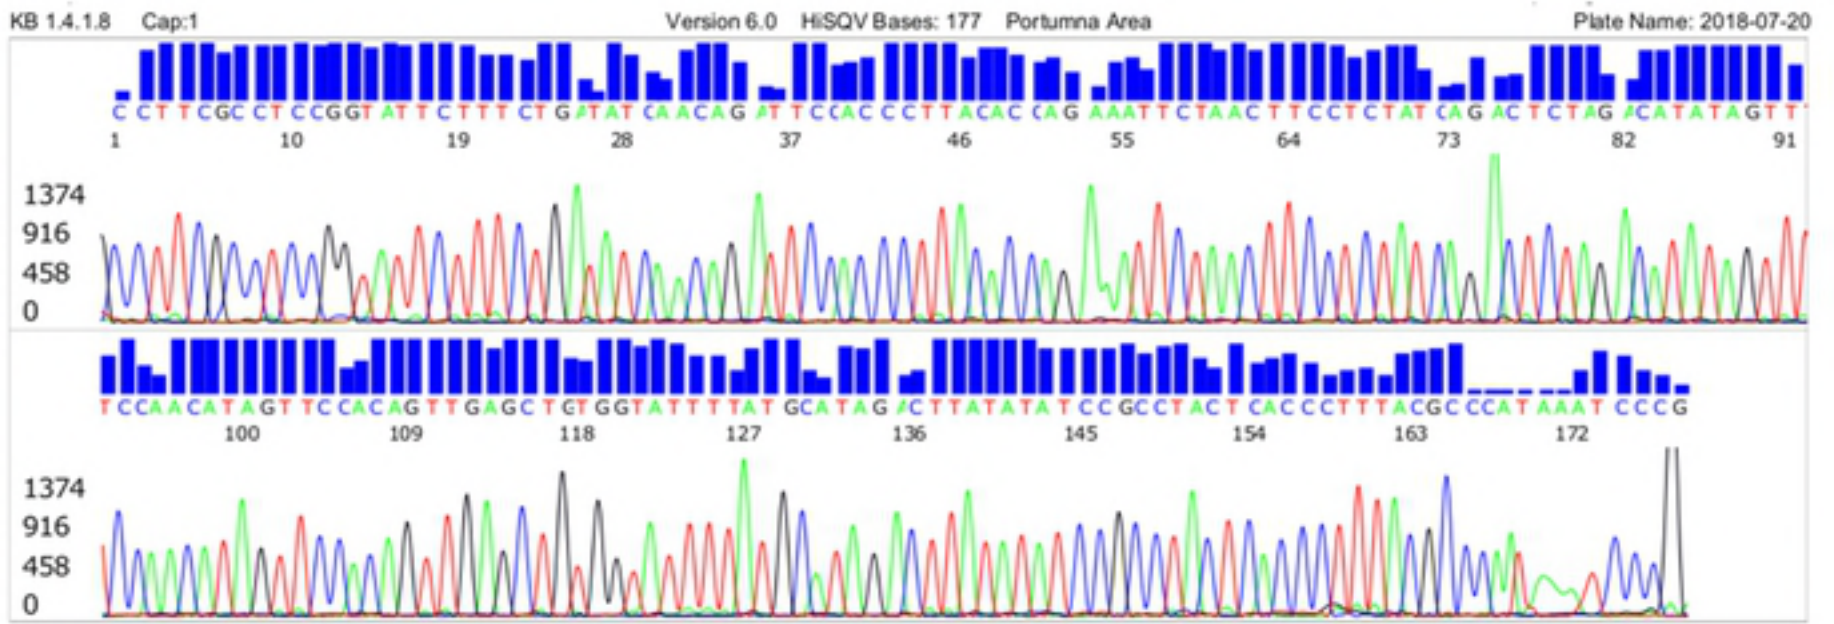**B**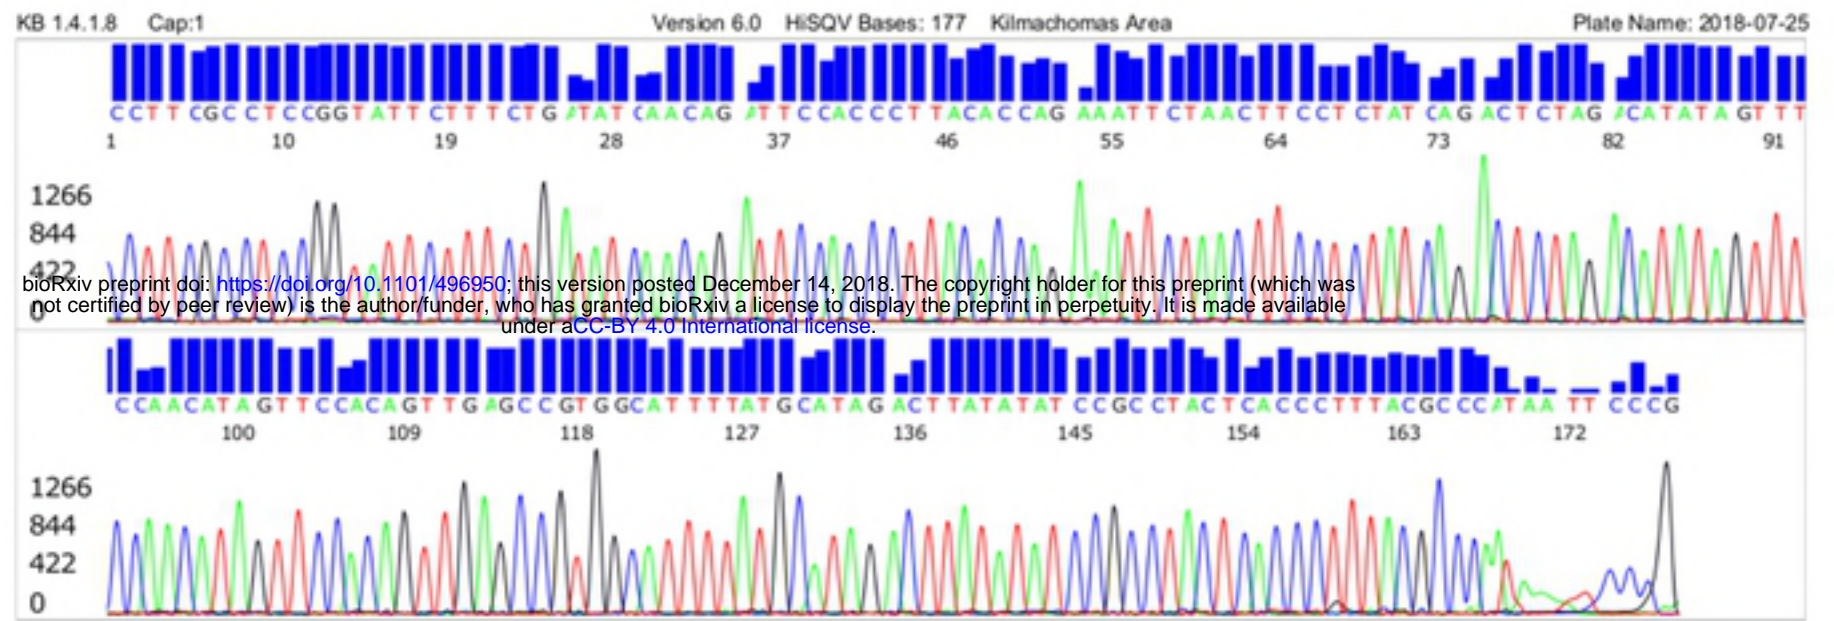**C**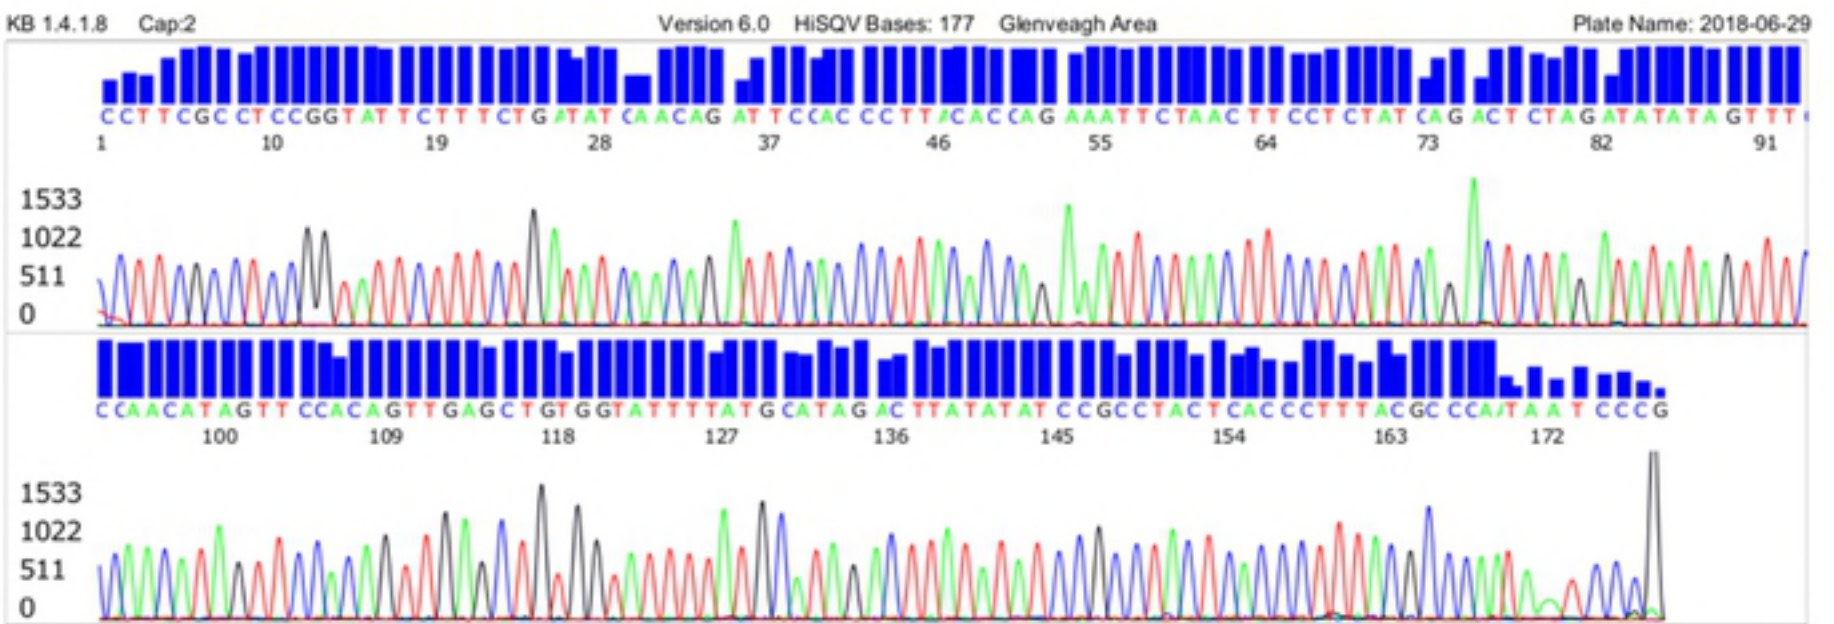**D**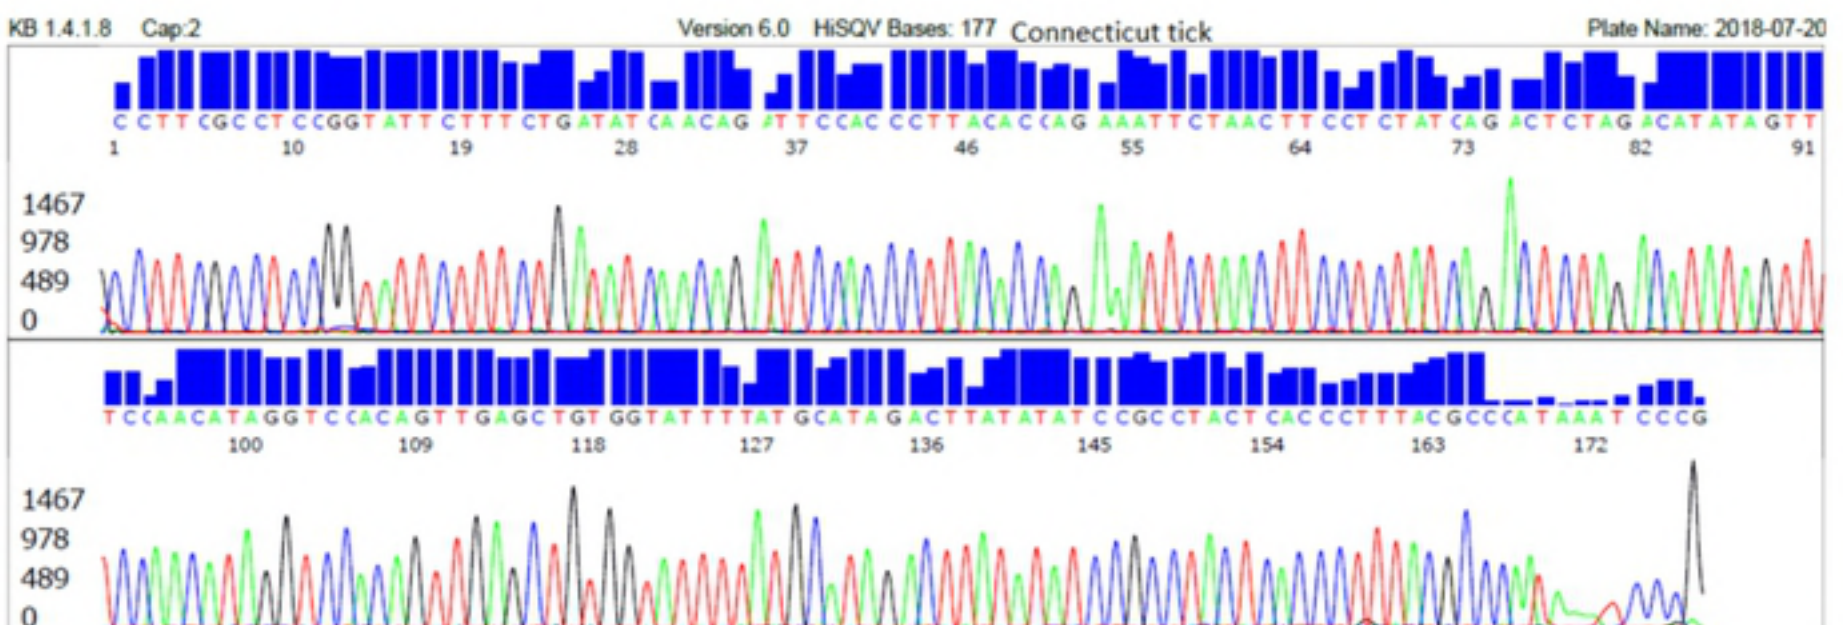

Fig 3



KB 1.4.1.8 Cap:2

Version 6.0 HiSQV Bases: 177 Portumna Area

Plate Name: 2018-07-20

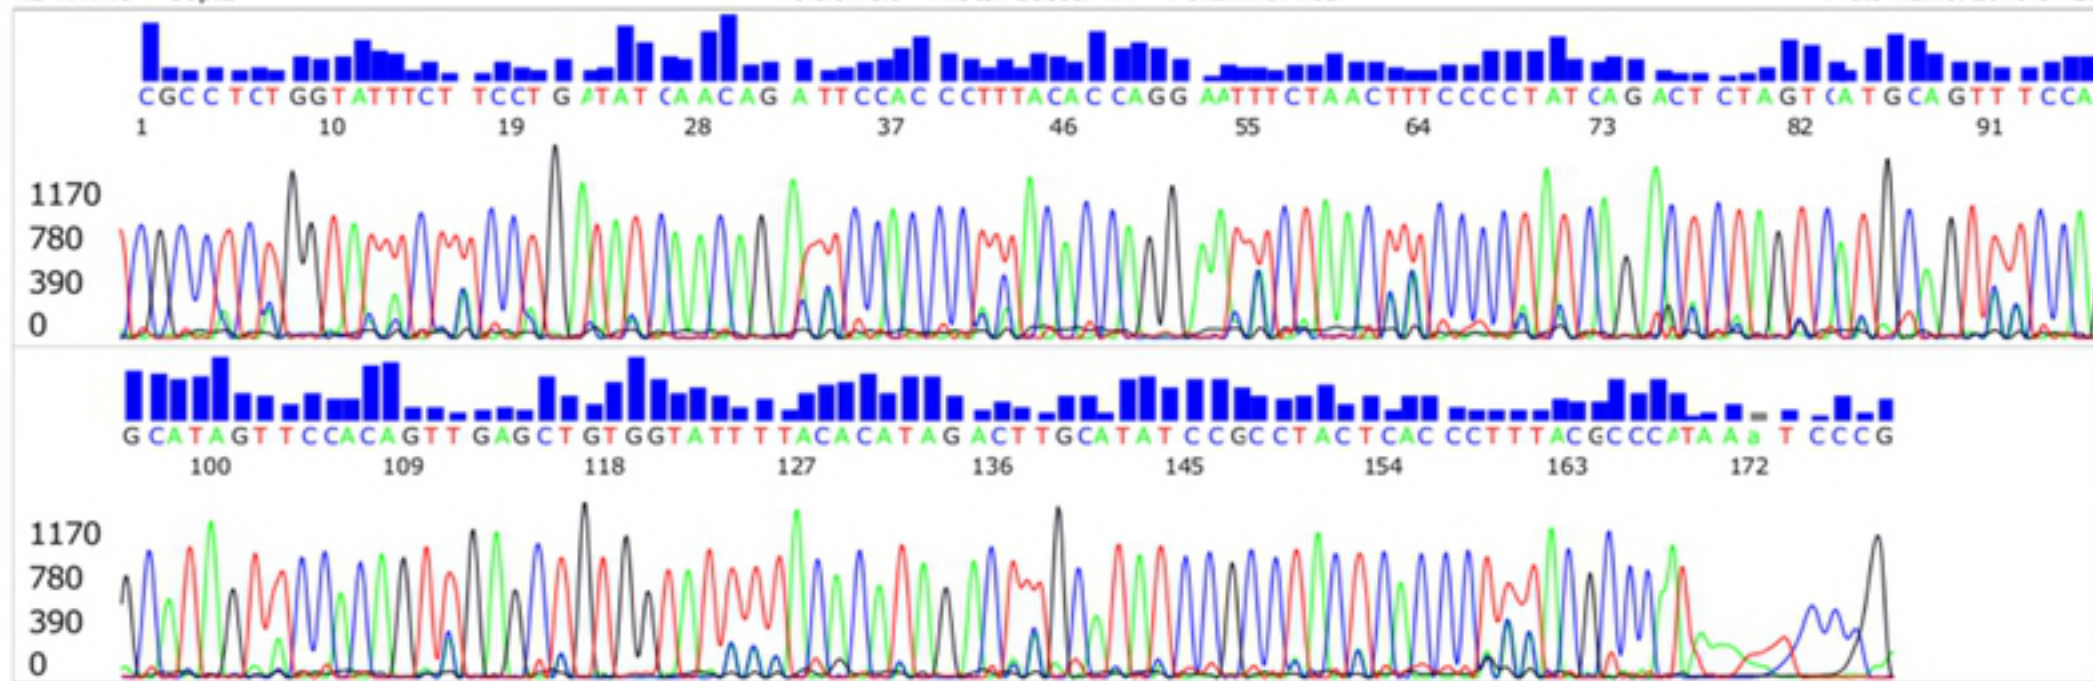

Fig 4

A

B

C

D

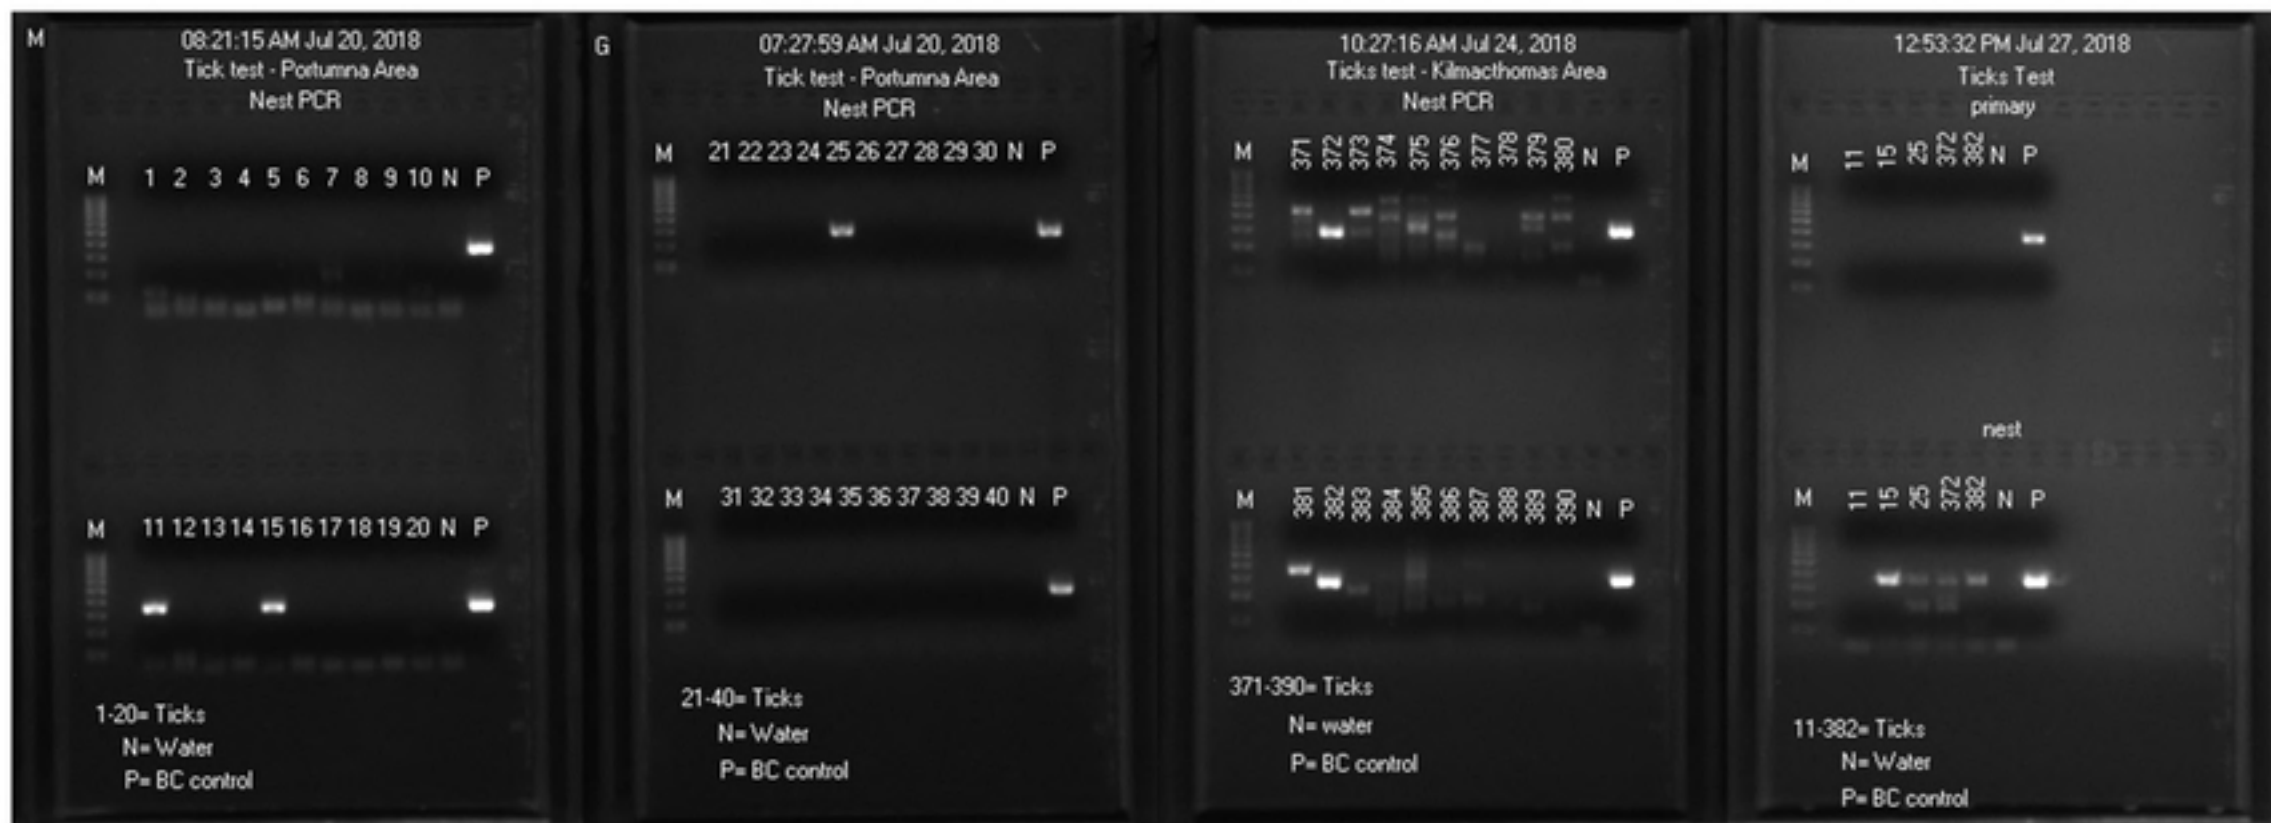

Fig 5
